# Supplementary material for: Oxygen isotope mass balance of atmospheric nitrate at Dome C, East Antarctica, during the OPALE campaign
Source: Copernicus journal article supplement (doi:10.5194/acp-16-2659-2016), 2016-03-03
Supplement: Supplementary file 1 [file data-supplement.xlsx]

## Sheet: Feuil1
Dome C Ozone data						Dome C Nitrate data
ID1	ID2	start date	Δ17O(O3)bulk /per mil			Sample Code	Date start	Date end	Mid-Point	[NO3-] ng m-3	δ17O /permil	δ18O /per mil	Δ17O /per mil	δ15N /per mil
DOMEC_2012_OZONE	7_2	2012-01-26 11:30:00	25.2143			DC-HV3-1	2011-10-29 11:40:00	2011-11-05 11:35:00	2011-11-01 23:37:30	59.4608	76.7184	85.542	32.422	-42.824
DOMEC_2012_OZONE	7_3	2012-02-02 14:15:00	24.5643			DC-HV3-2	2011-11-05 11:44:00	2011-11-13 09:41:00	2011-11-09 10:42:30	44.2729	69.1907	75.0456	30.33	-31.7467
DOMEC_2012_OZONE	7_4	2012-02-08 10:55:00	23.3643			DC-HV3-3	2011-11-13 09:52:00	2011-11-17 16:10:00	2011-11-15 13:01:00	62.7945	69.558	75.4138	30.507	-22.509
DOMEC_2012_OZONE	7_5	2012-02-15 09:04:00	25.2143			DC-HV3-4	2011-11-26 10:28:00	2011-12-03 10:04:00	2011-11-29 22:16:00	45.4709	65.8989	70.9401	29.163	-18.0286
DOMEC_2012_OZONE	7_6	2012-02-22 11:58:00	22.2643			DC-HV3-6	2011-12-10 10:07:00	2011-12-16 09:56:00	2011-12-13 10:01:30	91.6892	66.7483	71.7944	29.571	-15.47
DOMEC_2012_OZONE	7_7	2012-02-29 09:31:00	20.9143			DC-HV3-7	2011-12-16 10:06:00	2011-12-23 11:15:00	2011-12-19 22:40:30	62.7396	64.7263	68.9747	29.0091	-1.73752
DOMEC_2012_OZONE	7_8	2012-03-07 09:57:00	20.9643			DC-HV3-8	2011-12-23 12:20:00	2011-12-30 09:15:00	2011-12-26 22:47:30	30.8491	60.9902	64.0555	27.8198	1.67658
DOMEC_2012_OZONE	7_9	2012-03-14 11:32:00	22.8143			DC-HV3-9	2011-12-30 14:50:00	2012-01-02 10:30:00	2012-01-01 00:40:00	18.9745	63.4439	69.8492	27.2666	-1.3303
DOMEC_2012_OZONE	7_10	2012-03-21 10:31:00	21.3643			DC-HV3-10	2012-01-06 09:45:00	2012-01-12 08:35:00	2012-01-09 09:10:00	37.814	71.9839	79.7838	30.6672	-12.1485
DOMEC_2012_OZONE	8_1	2012-03-29 09:24:00	22.4058			DC-HV3-11	2012-01-12 14:31:00	2012-01-20 10:50:00	2012-01-16 12:40:30	23.32	66.4441	72.6448	28.8229	-1.92674
DOMEC_2012_OZONE	8_2	2012-04-04 10:12:00	22.1558			DC-HV3-12	2012-01-20	2012-01-27	2012-01-23 12:00:00	19.75	65.8105	69.9188	29.606	-5.97635
DOMEC_2012_OZONE	8_3	2012-04-11 11:30:00	23.9258
DOMEC_2012_OZONE	8_4	2012-04-19 09:30:00	23.1558
DOMEC_2012_OZONE	8_5	2012-04-26 14:49:00	22.6658
DOMEC_2012_OZONE	8_6	2012-05-02 12:02:00	23.6958
DOMEC_2012_OZONE	8_7	2012-05-09 11:17:00	25.6308
DOMEC_2012_OZONE	8_8	2012-05-16 17:50:00	25.2458
DOMEC_2012_OZONE	8_9	2012-05-23 11:38:00	24.3958
DOMEC_2012_OZONE	8_10	2012-05-31 14:07:00	26.3858
DOMEC_2012_OZONE	9_1	2012-06-06 15:19:00	26.8576
DOMEC_2012_OZONE	9_1	2012-06-06 15:19:00	27.0094
DOMEC_2012_OZONE	9_2	2012-06-13 11:26:00	27.2691
DOMEC_2012_OZONE	9_2	2012-06-13 11:26:00	27.9294
DOMEC_2012_OZONE	9_3	2012-06-28 11:37:00	26.3147
DOMEC_2012_OZONE	9_3	2012-06-28 11:37:00	26.8872
DOMEC_2012_OZONE	9_4	2012-07-05 11:56:00	27.464
DOMEC_2012_OZONE	9_4	2012-07-05 11:56:00	27.8092
DOMEC_2012_OZONE	9_5	2012-07-11 18:23:00	27.8456
DOMEC_2012_OZONE	9_5	2012-07-11 18:23:00	29.3988
DOMEC_2012_OZONE	9_6	2012-07-19 11:10:00	27.5375
DOMEC_2012_OZONE	9_6	2012-07-19 11:10:00	26.2534
DOMEC_2012_OZONE	9_7	2012-07-25 11:20:00	26.9343
DOMEC_2012_OZONE	9_7	2012-07-25 11:20:00	27.5086
DOMEC_2012_OZONE	9_8	2012-08-01 18:44:00	27.1358
DOMEC_2012_OZONE	9_9	2012-08-08 17:50:00	27.6391
DOMEC_2012_OZONE	9_10	2012-08-14 16:00:00	23.698
DOMEC_2012_OZONE	9_10	2012-08-14 16:00:00	24.7009
DOMEC_2012_OZONE	10_1	2012-08-23 11:17:00	25.8583
DOMEC_2012_OZONE	10_1	2012-08-23 11:17:00	25.2796
DOMEC_2012_OZONE	10_2	2012-08-29 16:53:00	25.1553
DOMEC_2012_OZONE	10_2	2012-08-29 16:53:00	21.8637
DOMEC_2012_OZONE	10_3	2012-09-05 18:01:00	24.0829
DOMEC_2012_OZONE	10_3	2012-09-05 18:01:00	23.8593
DOMEC_2012_OZONE	10_4	2012-09-12 17:29:00	24.3807
DOMEC_2012_OZONE	10_4	2012-09-12 17:29:00	22.6327
DOMEC_2012_OZONE	10_5	2012-09-19 17:37:00	24.1658
DOMEC_2012_OZONE	10_5	2012-09-19 17:37:00	24.1669
DOMEC_2012_OZONE	10_6	2012-09-26 16:41:00	23.9126
DOMEC_2012_OZONE	10_7	2012-10-03 15:19:00	25.4475
DOMEC_2012_OZONE	10_7	2012-10-03 15:19:00	25.2619
DOMEC_2012_OZONE	10_8	2012-10-10 13:16:00	32.9227
DOMEC_2012_OZONE	10_8	2012-10-10 13:16:00	28.5044
DOMEC_2012_OZONE	10_9	2012-10-17 17:57:00	28.588
DOMEC_2012_OZONE	10_10	2012-10-24 17:17:00	23.1971
DOMEC_2012_OZONE	11_1	2012-11-01 16:00:00	23.4913
DOMEC_2012_OZONE	11_2	2012-11-08 10:09:00	23.4487
DOMEC_2012_OZONE	11_3	2012-11-14 18:18:00	24.5194
DOMEC_2012_OZONE	11_4	2012-11-21 17:53:00	25.2273
DOMEC_2012_OZONE	11_5	2012-11-29 17:45:00	24.6854
DOMEC_2012_OZONE	11_6	2012-12-17 12:00:00	25.7294
DOMEC_2012_OZONE	11_7	2012-12-24 09:30:00	26.3259
DOMEC_2012_OZONE	11_8	2012-12-31 10:30:00	26.0646
DOMEC_2012_OZONE	11_9	2013-01-07 09:30:00	24.1101
