# Supplementary material for: Oxygen isotope mass balance of atmospheric nitrate at Dome C, East Antarctica, during the OPALE campaign
Source: Copernicus journal article supplement (doi:10.5194/acp-16-2659-2016), 2016-03-03
Supplement: Supplementary file [file acp-16-2659-2016-supplement-title-page.pdf › acp-16-2659-2016-supplement-title-page.pdf]

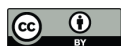

*Supplement of*

## **Oxygen isotope mass balance of atmospheric nitrate at Dome C, East Antarctica, during the OPALE campaign**

**Joël Savarino et al.**

*Correspondence to:* Joël Savarino (jsavarino@ujf-grenoble.fr)

- acp-16-2659-2016-supplement-title-page.pdf
- \_\_MACOSX
  - .\_data-supplement.xlsx
- data-supplement.xlsx

The copyright of individual parts of the supplement might differ from the CC-BY 3.0 licence.
